# Supplementary material for: Design and development of novel antibiotics based on FtsZ inhibition – in silico studies
Source: Royal Society of Chemistry journal article supplement (doi:10.1039/c8nj01034j), 2018-01-01
Supplement: c8nj01034j1.pdf [file c8nj01034j1.pdf]

Supporting Material

Design and development of novel antibiotics based on FtsZ inhibition - in silico studies

Aleksandar M. Veselinović<sup>1\*</sup>, Andrey Toropov<sup>2</sup>, Alla Toropova<sup>2</sup>, Dobrila Stanković-Đorđević<sup>3</sup>,  
Jovana B. Veselinović<sup>4</sup>

<sup>1</sup>Faculty of Medicine, Department of Chemistry, University of Niš, Niš, Serbia

<sup>2</sup>IRCCS - Istituto di Ricerche Farmacologiche Mario Negri, Milano, Italy

<sup>3</sup>Faculty of Medicine, Department of Microbiology, University of Niš, Niš, Serbia

<sup>4</sup>Faculty of Medicine, Department of Pharmacy, University of Niš, Niš, Serbia

\*Corresponding author:

Aleksandar M. Veselinović,

Faculty of Medicine, Department of Chemistry, University of Niš,

Bulevar Dr Zorana Đinđića 81, 18000 Niš, Serbia

Fax: +381 18 4238770; Phone: +381 18 4570029

E-mail: [aveselinovic@medfak.ni.ac.rs](mailto:aveselinovic@medfak.ni.ac.rs)

## Table of Content

|                            |    |
|----------------------------|----|
| Applicability domain ..... | 1  |
| Table S1 .....             | 2  |
| Table S2 .....             | 6  |
| Figure S1-S7 .....         | 13 |
| References .....           | 20 |

## 1. Applicability domain

When QSAR model is developed molecules from the training set can be used for defining one of its main features, QSAR model applicability domain (AD). AD is defined as biological, structural, or physicochemical space, knowledge, or information on which the developed QSAR model from training set is developed and which can be used further for predicting whether a developed QSPR model can be used on compounds which are not used in the model developing. For these reasons AD can be applied for the assessment of the reliability of a developed QSPR model, because if the application of the AD defines a studied compound as very different in comparison to all compounds from the training set, a reliable prediction of its property/activity is uncertain [1,2]. In presented research the difference between experimental and calculated values for a studied endpoint is used for defining the AD, with the application of  $\Delta(obs)$ ,  $d$  and  $\bar{d}$  as defined with Eq. 1 and 2. For each molecule used in the QSPR study,  $\Delta(obs)$  is calculated as the difference between experimental and calculated values from a studied endpoint.  $d$  and  $\bar{d}$  are defined in Eqs. 1 and 2, respectively, where  $n$  is the number of studied compounds.

$$\bar{d} = \frac{\sum \Delta(obs)}{n} \quad (1)$$

$$d = \frac{\sum [\Delta(obs) - \Delta(calc)]^2}{n} \quad (2)$$

If  $\Delta(obs)$  of a studied compound belongs within the range  $\bar{d} - d$  and  $\bar{d} + d$ , then it falls in the defined model AD, but, if a compound's  $\Delta(obs)$  does not belong within a defined range, then that compound does not belong in the defined AD. For this reason, the compound is considered as outlier, and it is discarded from the development of a QSPR model. A defined methodology for the determination of the AD was successfully applied in the development of various QSAR models based on the Monte Carlo method<sup>5</sup>. The relation used for defining the AD is given in Eq. 3:

$$\Delta(obs) \in (\bar{d} - d, \bar{d} + d) \quad (3)$$

Table S1. The SMILES notation of the studied molecules, calculated values for the DCW, experimental data (Ac) – expr, the values of Ac calculated with the application of CORAL software – calc, the difference between expr and calc – diff for the built QSPR model.

|    | SMILES notation                                           | DCW      | Ac(expr.) | Ac(calc.) | Diff    | Set      |
|----|-----------------------------------------------------------|----------|-----------|-----------|---------|----------|
| 1  | <chem>COc1cc(ccc1)C(N)=O</chem>                           | 40.68943 | 1.868     | 2.158     | -0.29   | Training |
| 2  | <chem>NC(=O)c1c(F)ccc(OCCCCC)c1F</chem>                   | 102.5646 | 4.507     | 4.996     | -0.489  | Training |
| 3  | <chem>NC(=O)c2c(F)c(OCc1nc(C)cs1)ccc2F</chem>             | 82.97029 | 4.25      | 4.0973    | 0.1527  | Training |
| 4  | <chem>NC(=O)c2c(F)c(OCc1ncc(C)s1)ccc2F</chem>             | 65.3319  | 3.045     | 3.2883    | -0.2433 | Training |
| 5  | <chem>NC(=O)c3c(F)c(OCc1nc(cs1)c2cccc2)ccc3F</chem>       | 90.10409 | 4.973     | 4.4245    | 0.5485  | Test     |
| 6  | <chem>NC(=O)c2c(F)ccc(OCCn1cccn1)c2F</chem>               | 70.45059 | 3.018     | 3.5231    | -0.5051 | Training |
| 7  | <chem>NC(=O)c3c(F)ccc(Oc1nc2cccc2s1)c3F</chem>            | 75.4637  | 3.077     | 3.753     | -0.676  | Training |
| 8  | <chem>NC(=O)c3c(F)ccc(OCc1nc2cccc2s1)c3F</chem>           | 79.2083  | 5.204     | 3.9248    | 1.2792  | Training |
| 9  | <chem>NC(=O)c3c(F)ccc(OCc1ccc2cccc2n1)c3F</chem>          | 80.4635  | 4.293     | 3.9823    | 0.3107  | Training |
| 10 | <chem>NC(=O)c3c(F)ccc(OCc1nc2cccc2o1)c3F</chem>           | 79.14101 | 3.376     | 3.9217    | -0.5457 | Test     |
| 11 | <chem>Cc2cc(COc1ccc(F)c(C(N)=O)c1F)sc2</chem>             | 75.24137 | 3.947     | 3.7428    | 0.2042  | Training |
| 12 | <chem>NC(=O)c2c(F)ccc(OCc1cccc(C)n1)c2F</chem>            | 77.46416 | 3.939     | 3.8448    | 0.0942  | Test     |
| 13 | <chem>NC(=O)c3c(F)ccc(OCc2nc1c(ccc1Cl)s2)c3F</chem>       | 96.69232 | 4.345     | 4.7267    | -0.3817 | Training |
| 14 | <chem>NC(=O)c3c(F)ccc(OCc1nc2ccc(Cl)cc2s1)c3F</chem>      | 94.15516 | 4.948     | 4.6103    | 0.3377  | Training |
| 15 | <chem>NC(=O)c3c(F)ccc(OCc1nc2cccc(Cl)c2s1)c3F</chem>      | 93.40735 | 4.948     | 4.576     | 0.372   | Training |
| 16 | <chem>NC(=O)c3c(F)ccc(OCc1nc2c(C)cccc2s1)c3F</chem>       | 94.84867 | 4.32      | 4.6421    | -0.3221 | Test     |
| 17 | <chem>NC(=O)c3c(F)ccc(OCc1nc2ccc(C)cc2s1)c3F</chem>       | 95.59648 | 4.621     | 4.6764    | -0.0554 | Training |
| 18 | <chem>NC(=O)c3c(F)ccc(OCc1nc2c(ccc2s1)OC)c3F</chem>       | 96.16465 | 4.34      | 4.7025    | -0.3625 | Training |
| 19 | <chem>NC(=O)c3c(F)ccc(OCc1nc2ccc(cc2s1)OC)c3F</chem>      | 96.91246 | 3.136     | 4.7368    | -1.6008 | Training |
| 20 | <chem>NC(=O)c4c(F)ccc(OCc1nc2c(ccc2s1)c3cccc3)c4F</chem>  | 88.28479 | 3.189     | 4.3411    | -1.1521 | Training |
| 21 | <chem>NC(=O)c4c(F)ccc(OCc1nc2ccc(cc2s1)c3cccc3)c4F</chem> | 89.0326  | 3.189     | 4.3754    | -1.1864 | Training |
| 22 | <chem>NC(=O)c4c(F)ccc(OCc1nc2cccc(c2s1)c3cccc3)c4F</chem> | 88.28479 | 3.189     | 4.3411    | -1.1521 | Training |
| 24 | <chem>NC(=O)c3c(F)ccc(OCc1nc2cc(Cl)ccc2s1)c3F</chem>      | 94.15516 | 5.551     | 4.6103    | 0.9407  | Training |
| 25 | <chem>NC(=O)c3c(F)ccc(OCc1nc2cc(C)ccc2s1)c3F</chem>       | 95.59648 | 4.922     | 4.6764    | 0.2456  | Training |
| 26 | <chem>NC(=O)c3c(F)ccc(OCc1nc2cc(ccc2s1)CCC)c3F</chem>     | 117.6633 | 6.462     | 5.6886    | 0.7734  | Training |

|    |                                                                         |          |       |        |         |          |
|----|-------------------------------------------------------------------------|----------|-------|--------|---------|----------|
| 27 | <chem>NC(=O)c3c(F)ccc(OCc1nc2cc(ccc2s1)OC)c3F</chem>                    | 96.91246 | 5.244 | 4.7368 | 0.5072  | Training |
| 28 | <chem>NC(=O)c3c(F)ccc(OCc1nc2cc(ccc2s1)OCC)c3F</chem>                   | 108.9121 | 6.464 | 5.2872 | 1.1768  | Training |
| 29 | <chem>NC(=O)c4c(F)ccc(OCc1nc2cc(ccc2s1)c3ccccc3)c4F</chem>              | 89.0326  | 6.2   | 4.3754 | 1.8246  | Training |
| 30 | <chem>NC(=O)c3c(F)ccc(OCc1nc2cc(Br)ccc2s1)c3F</chem>                    | 117.5234 | 6.504 | 5.6821 | 0.8219  | Test     |
| 31 | <chem>NC(=O)c3c(F)ccc(OCc1nc2cc(ccc2s1)C(F)(F)F)c3F</chem>              | 113.3412 | 6.191 | 5.4903 | 0.7007  | Test     |
| 32 | <chem>NC(=O)c3c(F)ccc(OCc1nc2cc(O)ccc2s1)c3F</chem>                     | 92.89664 | 4.021 | 4.5526 | -0.5316 | Test     |
| 33 | <chem>NC(=O)c3c(F)ccc(OCc1nc2cc(N)ccc2s1)c3F</chem>                     | 85.63922 | 3.719 | 4.2197 | -0.5007 | Training |
| 34 | <chem>NC(=O)c3c(F)ccc(OCc1nc2cc(ccc2s1)N(C)C)c3F</chem>                 | 87.65862 | 3.754 | 4.3123 | -0.5583 | Training |
| 35 | <chem>NC(=O)c3c(F)ccc(OCc1nc2cc(ccc2s1)C(N)=O)c3F</chem>                | 87.84261 | 3.754 | 4.3208 | -0.5668 | Training |
| 36 | <chem>NC(=O)c3c(F)ccc(OCc1nc2cc(ccc2s1)C(=O)O)c3F</chem>                | 94.29396 | 3.755 | 4.6167 | -0.8617 | Training |
| 37 | <chem>NC(=O)c3c(F)ccc(OCc1nc2cc(ccc2s1)C(=O)OC)c3F</chem>               | 97.24277 | 5.57  | 4.7519 | 0.8181  | Training |
| 38 | <chem>NC(=O)c4c(F)ccc(OCc1nc2cc(ccc2s1)c3ncno3)c4F</chem>               | 118.8551 | 5.89  | 5.7432 | 0.1468  | Training |
| 39 | <chem>NC(=O)c4c(F)ccc(OCc1nc2cc(ccc2s1)c3nccn3)c4F</chem>               | 81.86677 | 3.78  | 4.0467 | -0.2667 | Test     |
| 40 | <chem>NC(=O)c3c(F)ccc(OCc1nc2cc(Cl)enc2s1)c3F</chem>                    | 112.1993 | 5.551 | 5.4379 | 0.1131  | Training |
| 41 | <chem>NC(=O)c4c(F)ccc(OCc1nc2cc(cnc2s1)c3ccccc3)c4F</chem>              | 107.0768 | 5.9   | 5.203  | 0.697   | Training |
| 42 | <chem>NC(=O)c3c(F)ccc(OCc1nc2cc(cnc2s1)OCC)c3F</chem>                   | 126.9562 | 6.465 | 6.1148 | 0.3502  | Training |
| 43 | <chem>NC(=O)c3c(F)ccc(OCc1nc2cc(Cl)ncc2s1)c3F</chem>                    | 94.9643  | 4.648 | 4.6474 | 0.0006  | Test     |
| 44 | <chem>NC(=O)c3c(F)ccc(OCc1nc2cc(OC)c(Cl)nc2s1)c3F</chem>                | 108.2252 | 4.382 | 5.2557 | -0.8737 | Training |
| 45 | <chem>NC(=O)c3c(F)c(OCc1nc(co1)c2ccccc2)ccc3F</chem>                    | 87.22225 | 4.314 | 4.2923 | 0.0217  | Training |
| 46 | <chem>NC(=O)c3c(F)c(OCc1nc(co1)c2ccc(O)cc2)ccc3F</chem>                 | 100.9106 | 4.636 | 4.9202 | -0.2842 | Test     |
| 47 | <chem>NC(=O)c3c(F)c(OCc1nc(co1)c2ccc(Cl)cc2)ccc3F</chem>                | 102.1691 | 4.962 | 4.9779 | -0.0159 | Training |
| 48 | <chem>NC(=O)c3c(F)c(OCc1nc(co1)c2ccc(OC)cc2)ccc3F</chem>                | 103.8594 | 5.255 | 5.0554 | 0.1996  | Training |
| 49 | <chem>NC(=O)c3c(F)c(OCc1nc(c(C)o1)c2ccc(Cl)cc2)ccc3F</chem>             | 109.299  | 5.879 | 5.3049 | 0.5741  | Test     |
| 50 | <chem>NC(=O)c3c(F)c(OCc1nc(c(Br)o1)c2ccc(Cl)cc2)ccc3F</chem>            | 143.6156 | 6.869 | 6.8789 | -0.0099 | Training |
| 51 | <chem>NC(=O)c3c(F)c(OCc1nc(c(N)o1)c2ccc(Cl)cc2)ccc3F</chem>             | 90.6516  | 3.773 | 4.4496 | -0.6766 | Training |
| 52 | <chem>NC(=O)c3c(F)c(OCc1nc(c(o1)[N+](=[O-])=O)c2ccc(Cl)cc2)ccc3F</chem> | 72.65428 | 3.8   | 3.6241 | 0.1759  | Training |
| 53 | <chem>NC(=O)c3c(F)c(OCc1nc(c(OC)o1)c2ccc(Cl)cc2)ccc3F</chem>            | 109.548  | 5.897 | 5.3163 | 0.5807  | Training |
| 54 | <chem>NC(=O)c3c(F)c(OCc1nc(c(CO)o1)c2ccc(Cl)cc2)ccc3F</chem>            | 110.9263 | 4.693 | 5.3796 | -0.6866 | Training |
| 55 | <chem>NC(=O)c3c(F)c(OCc1nc(c(OCC)o1)c2ccc(Cl)cc2)ccc3F</chem>           | 121.5476 | 6.835 | 5.8667 | 0.9683  | Test     |
| 56 | <chem>NC(=O)c3c(F)c(OCc1nc(c(CCC)o1)c2ccc(Cl)cc2)ccc3F</chem>           | 134.0501 | 7.154 | 6.4402 | 0.7138  | Training |

|    |                                                                          |          |       |        |         |          |
|----|--------------------------------------------------------------------------|----------|-------|--------|---------|----------|
| 57 | <chem>NC(=O)c3c(F)c(OCc1nc(c(CC=C)o1)c2ccc(Cl)cc2)ccc3F</chem>           | 150.6818 | 6.829 | 7.203  | -0.374  | Training |
| 58 | <chem>NC(=O)c3c(F)c(OCc1nc(c(CCCO)o1)c2ccc(Cl)cc2)ccc3F</chem>           | 129.3658 | 5.325 | 6.2253 | -0.9003 | Training |
| 59 | <chem>NC(=O)c3c(F)c(OCc1nc(c(CC)o1)c2ccc(OC)cc2)ccc3F</chem>             | 129.3005 | 6.511 | 6.2223 | 0.2887  | Test     |
| 60 | <chem>NC(=O)c4c(F)c(OCc1nc(c(o1)C2CC2)c3ccc(OC)cc3)ccc4F</chem>          | 137.0224 | 6.524 | 6.5765 | -0.0525 | Training |
| 61 | <chem>NC(=O)c4c(F)c(OCc1nc(c(o1)c2ccccc2)c3ccc(OC)cc3)ccc4F</chem>       | 114.483  | 6.562 | 5.5427 | 1.0193  | Training |
| 62 | <chem>NC(=O)c4c(F)ccc(OCc1nc(c(o1)c2cnsc2)c3ccc(OC)cc3)c4F</chem>        | 117.658  | 5.345 | 5.6883 | -0.3433 | Training |
| 63 | <chem>FC(F)(F)c1ccc(cc1)c3nc(COc2ccc(F)c(c2F)C(N)=O)oc3Br</chem>         | 138.5985 | 6.6   | 6.6488 | -0.0488 | Training |
| 64 | <chem>FC(F)(F)c1ccc(cc1)c3nc(COc2ccc(F)c(c2F)C(N)=O)oc3C#N</chem>        | 108.8656 | 5.326 | 5.285  | 0.041   | Training |
| 65 | <chem>FC(F)(F)Oc1ccc(cc1)c3nc(COc2ccc(F)c(c2F)C(N)=O)oc3Cl</chem>        | 133.6508 | 6.578 | 6.4219 | 0.1561  | Training |
| 66 | <chem>FC(F)(F)Oc1ccc(cc1)c3nc(COc2ccc(F)c(c2F)C(N)=O)oc3Br</chem>        | 141.2232 | 6.917 | 6.7692 | 0.1478  | Training |
| 67 | <chem>FC(F)(F)Oc1ccc(cc1)c3nc(COc2ccc(F)c(c2F)C(N)=O)oc3I</chem>         | 146.4128 | 6.954 | 7.0072 | -0.0532 | Training |
| 68 | <chem>FC(F)(F)Oc1ccc(cc1)c3nc(COc2ccc(F)c(c2F)C(N)=O)oc3C(F)(F)F~</chem> | 134.1588 | 5.987 | 6.4452 | -0.4582 | Training |
| 69 | <chem>O=C(N)c1cc(O)ccc1</chem>                                           | 91.26327 | 5.137 | 4.4777 | 0.6593  | Training |
| 70 | <chem>NC(=O)c1cc(OCCCl)ccc1</chem>                                       | 73.24415 | 3.523 | 3.6512 | -0.1282 | Training |
| 71 | <chem>NC(=O)c1cc(OCCCl)ccc1</chem>                                       | 79.68399 | 4.454 | 3.9466 | 0.5074  | Training |
| 72 | <chem>NC(=O)c1cc(OCCCCCl)ccc1</chem>                                     | 86.12383 | 5.383 | 4.2419 | 1.1411  | Training |
| 73 | <chem>NC(=O)c1cc(OCCCCCl)ccc1</chem>                                     | 92.56367 | 3.6   | 4.5373 | -0.9373 | Training |
| 74 | <chem>NC(=O)c1cc(OCCBr)ccc1</chem>                                       | 66.16264 | 3.28  | 3.3264 | -0.0464 | Training |
| 75 | <chem>NC(=O)c1cc(OCCBr)ccc1</chem>                                       | 72.60248 | 3.6   | 3.6218 | -0.0218 | Training |
| 76 | <chem>NC(=O)c1cc(OCCBr)ccc1</chem>                                       | 79.04232 | 4.531 | 3.9171 | 0.6139  | Training |
| 77 | <chem>NC(=O)c1cc(OCCBr)ccc1</chem>                                       | 85.48216 | 4.252 | 4.2125 | 0.0395  | Test     |
| 78 | <chem>NC(=O)c1cc(OCCCCBr)ccc1</chem>                                     | 91.922   | 3.671 | 4.5079 | -0.8369 | Training |
| 79 | <chem>NC(=O)c1cc(OCCCCOCC)ccc1</chem>                                    | 87.55336 | 3.594 | 4.3075 | -0.7135 | Training |
| 80 | <chem>NC(=O)c1cc(OCCCCOCC)ccc1</chem>                                    | 87.55336 | 3.918 | 4.3075 | -0.3895 | Test     |
| 81 | <chem>NC(=O)c1cc(OCCOCCCC)ccc1</chem>                                    | 87.55336 | 4.844 | 4.3075 | 0.5365  | Training |
| 82 | <chem>NC(=O)c2cc(OCCCOc1ccccc1)ccc2</chem>                               | 57.02518 | 3.326 | 2.9073 | 0.4187  | Training |
| 83 | <chem>NC(=O)c2cc(OCCCOc1ccc(OC)cc1)ccc2</chem>                           | 73.66233 | 3.18  | 3.6704 | -0.4904 | Test     |
| 84 | <chem>Clc2ccc(OCCCOc1ccccc1)C(N)=O)cc2</chem>                            | 64.70941 | 3.378 | 3.2597 | 0.1183  | Training |
| 85 | <chem>[O-][N+](=O)c1ccc(cc1)OCCCOc2cc(ccc2)C(N)=O</chem>                 | 57.81389 | 3.392 | 2.9435 | 0.4485  | Training |
| 86 | <chem>NC(=O)c2cc(OCCCOc1ccccc1)ccc2</chem>                               | 63.46502 | 3.348 | 3.2027 | 0.1453  | Training |

|    |                                                           |          |       |        |         |          |
|----|-----------------------------------------------------------|----------|-------|--------|---------|----------|
| 87 | <chem>NC(=O)c2cc(OCCCCOc1ccc(OC)cc1)ccc2</chem>           | 80.10217 | 3.391 | 3.9658 | -0.5748 | Test     |
| 88 | <chem>C1c2ccc(OCCCCOc1cc(ccc1)C(N)=O)cc2</chem>           | 71.14925 | 3.397 | 3.5551 | -0.1581 | Training |
| 89 | <chem>[O-][N+](=O)c1ccc(cc1)OCCCCOc2cc(ccc2)C(N)=O</chem> | 64.25373 | 3.411 | 3.2388 | 0.1722  | Training |
| 90 | <chem>NC(=O)c2cc(OCCCN1cncn1)ccc2</chem>                  | 74.93402 | 3.284 | 3.7287 | -0.4447 | Test     |
| 91 | <chem>NC(=O)c2cc(OCCCN1cncn1)ccc2</chem>                  | 81.37386 | 3.308 | 4.0241 | -0.7161 | Test     |
| 92 | <chem>NC(=O)c2cc(OCCCN1ccnc1)ccc2</chem>                  | 79.39307 | 3.306 | 3.9332 | -0.6272 | Test     |
| 93 | <chem>NC(=O)c1cc(ccc1)OCCCN2c3ccccc3nc2C</chem>           | 73.55311 | 3.402 | 3.6654 | -0.2634 | Test     |
| 94 | <chem>NC(=O)c1cc(ccc1)OCCSc2nc3ccccc3s2</chem>            | 71.20661 | 3.411 | 3.5577 | -0.1467 | Test     |
| 95 | <chem>NC(=O)c1cc(ccc1)OCCSc2nc3ccccc3s2</chem>            | 77.64645 | 3.43  | 3.8531 | -0.4231 | Test     |
| 96 | <chem>NC(=O)c1cc(ccc1)OCCSc2nc3ccccc3n2</chem>            | 71.19445 | 3.407 | 3.5572 | -0.1502 | Training |
| 97 | <chem>NC(=O)c1cc(ccc1)OCCSc2nc3ccccc3s2</chem>            | 84.08629 | 3.447 | 4.1485 | -0.7015 | Test     |

Table S2. The list of SA<sub>k</sub>s together with their correlation weights for the three runs of the Monte Carlo optimization

| SA <sub>k</sub> | CW(SA <sub>k</sub> ) |          |          |
|-----------------|----------------------|----------|----------|
|                 | Run 1                | Run 2    | Run 3    |
| #.....          | -0.80818             | -1.24613 | -1.87344 |
| \$10011000000   | 0.3717               | -0.30894 | 1.99769  |
| \$10011000010   | 1.68322              | 0.94243  | 1.49703  |
| \$10011000100   | -0.06119             | 0.99702  | 0.56411  |
| \$10011001000   | 0.62931              | 0.25447  | -0.62012 |
| \$10011001001   | 6.62961              | 4.74703  | 4.0669   |
| \$10011001010   | 3.50111              | 4.74683  | 2.93972  |
| \$10011001100   | -0.8142              | 0.24994  | -0.81012 |
| \$10011001110   | 9.00294              | 6.56144  | 6.87027  |
| \$11011001000   | -1.43347             | -0.87131 | -0.93612 |
| (...(.....      | -0.25143             | -0.37877 | -0.30844 |
| (.....          | 1.50277              | 0.81214  | 0.12999  |
| (..C...(...     | -0.31355             | -0.24748 | -1.00043 |
| (..F...(...     | -0.24855             | 1.62989  | 1.31257  |
| (..Br...(...    | 3.93456              | 4.12281  | 3.87337  |
| (..Cl...(...    | -0.00479             | -1.12296 | -1.62044 |
| (..N...(...     | -0.44207             | 0.37479  | 0.18324  |
| (..O...(...     | 1.24777              | 4.25096  | 1.75457  |
| (..c...(...     | -2.99915             | -4.9339  | -5.06318 |
| +.....          | -0.62708             | -0.49861 | -0.24737 |
| +...[...(...    | -0.24836             | -0.87033 | 0.99784  |
| -.....          | -0.2495              | -1.25273 | 0.562    |
| -...[...(...    | -1.87905             | -1.31137 | -2.12076 |
| 1...(.....      | 0.12062              | -0.18608 | -0.43792 |
| 1.....          | 7.99659              | 7.06165  | 1.68629  |
| 1..F...(...     | 1.1297               | -0.43441 | 1.62204  |
| 1..Cl...(...    | 0.25034              | -0.81644 | -1.12046 |
| 1..c...(...     | 2.81698              | 1.24942  | 3.12228  |
| 1..n...(...     | 0.99508              | 0.99691  | 1.00429  |
| 1..o...(...     | -0.87851             | 0.37048  | 0.06214  |
| 1..s...(...     | -2.37761             | -0.50034 | -0.99526 |
| 2...(.....      | -0.00258             | -0.74588 | -0.18533 |
| 2.....          | 0.00466              | 0.24586  | 0.06112  |
| 2..C...(...     | 1.87571              | 5.06014  | 5.18969  |
| 2..F...(...     | 3.24954              | 1.62369  | 2.93648  |
| 2..c...(...     | -0.62433             | -1.56685 | -0.37873 |
| 2..n..1...      | 1.56155              | 0.18847  | 2.87566  |



|               |          |          |          |
|---------------|----------|----------|----------|
| 2...o...1...  | 1.00144  | 0.99875  | 0.99512  |
| 2...s...(...  | -0.19071 | -0.80969 | 0.12731  |
| 2...s...1...  | 0.62932  | 0.19081  | 0.7515   |
| 3...(.....    | 0.31408  | 2.12139  | 0.55834  |
| 3.....        | 0.8145   | 0.49992  | -0.5651  |
| 3...C...#...  | -1.06048 | -1.56026 | -0.62393 |
| 3...C...(...  | -6.503   | -7.30799 | -4.75024 |
| 3...c...(...  | 2.37413  | 1.56555  | 1.49736  |
| 3...c...2...  | 0.9981   | 0.99811  | 0.99569  |
| 3...n...2...  | -1.55985 | -2.12921 | -1.49551 |
| 3...s...2...  | 1.00234  | 0.99554  | 0.9991   |
| 4.....        | 0.74513  | 0.49588  | 0.24743  |
| 4...c...(...  | 1.24577  | 0.43528  | 0.62872  |
| =...(.....    | -2.00432 | -2.62802 | -1.75299 |
| =.....        | -0.37261 | -0.05989 | -0.62155 |
| =...C...(...  | 9.87221  | 9.62696  | 9.49682  |
| =...O...(...  | -6.05969 | -4.56542 | -4.68436 |
| C...#.....    | 0.00071  | 0.99678  | 0.4984   |
| C...(...      | 1.8756   | 2.18626  | 2.12628  |
| C...(...1...  | 0.37789  | 0.18593  | 1.12352  |
| C...(...2...  | 0.25023  | 1.37827  | 0.31744  |
| C...(...=...  | 1.87781  | 1.62604  | 1.80862  |
| C...(...C...  | -6.55788 | -6.87483 | -5.06687 |
| C.....        | 2.00399  | 1.9967   | 1.49876  |
| C...2...(...  | 2.81017  | 3.8743   | 3.87258  |
| C...2.....    | 1.19248  | -0.00288 | 0.68958  |
| C...2...C...  | 4.30896  | 3.93979  | 2.49585  |
| C...3.....    | -2.62684 | -3.37821 | -1.06636 |
| C...=.....    | 6.44149  | 7.43867  | 5.93357  |
| C...=...C...  | 3.05956  | 1.69061  | 2.25315  |
| C...C...(...  | 6.49523  | 7.00448  | 5.87359  |
| C...C.....    | 3.00323  | 2.00326  | 2.49731  |
| C...C...2...  | 1.31467  | 4.00298  | 2.87807  |
| C...C...=...  | 2.12068  | 2.12426  | 2.56521  |
| C...C...C...  | 1.43262  | 2.06112  | 0.94073  |
| C...Br...(... | 1.56018  | 2.43899  | 2.31723  |
| C...Cl...(... | 3.9423   | 3.94189  | 3.50117  |
| C...O...(...  | 0.99733  | 1.87444  | 1.62245  |
| C...O...C...  | -0.87626 | -0.50489 | -0.18307 |
| C...c...1...  | 0.62302  | 1.81347  | 2.18754  |
| C...c...2...  | 1.37909  | 1.81476  | 1.00263  |

|              |          |          |          |
|--------------|----------|----------|----------|
| C...n...1... | 2.12898  | 1.62291  | 0.93924  |
| C...n...2... | 1.00351  | 0.99709  | 1.00193  |
| F...(...(... | -0.56119 | -0.12575 | -0.30888 |
| F...(...     | 1.74777  | 1.68378  | 1.25053  |
| F...(...C... | 1.62343  | 0.87028  | 1.99896  |
| F...(...F... | -0.31624 | 0.68852  | 1.62024  |
| F.....       | 1.99877  | 1.99812  | 1.93629  |
| F...1.....   | -0.68761 | -0.81709 | 1.75268  |
| F...2.....   | 1.0662   | 1.49896  | 0.37181  |
| F...3.....   | 1.18611  | 2.74951  | 1.99843  |
| F...4.....   | 0.06597  | 0.12585  | 0.4963   |
| F...C...(... | 2.25281  | 2.56227  | 2.37229  |
| F...C.....   | 2.24874  | 1.2507   | 0.18869  |
| Br..(...     | 4.00347  | 2.87463  | 3.56013  |
| Br.....      | 5.37821  | 4.37194  | 5.18997  |
| Br..3.....   | 2.62936  | 3.43747  | 2.49674  |
| Br..C.....   | -0.06268 | 0.81389  | 1.62564  |
| Br..C...C... | 1.37511  | 2.62254  | 0.56391  |
| I.....       | 4.93408  | 3.93579  | 3.87669  |
| I...3.....   | 3.87656  | 4.37842  | 4.62836  |
| Cl..(...     | 1.50465  | 2.81326  | 2.50093  |
| Cl.....      | 1.25304  | 1.99763  | 1.87669  |
| Cl..1.....   | 2.87318  | 0.43557  | 1.56417  |
| Cl..3.....   | 6.49976  | 3.81717  | 3.31115  |
| Cl..C.....   | 4.06639  | 4.24716  | 4.12174  |
| Cl..C...C... | 4.24747  | 4.62704  | 3.37537  |
| Cl.c...2...  | 0.68374  | 1.75144  | 0.18462  |
| HALO00000000 | 1.87868  | 0.1293   | 2.2548   |
| HALO00100000 | 0.5644   | 1.93755  | 2.25499  |
| HALO01000000 | 0.62628  | 0.31627  | 0.44177  |
| HALO10000000 | -0.37168 | 0.81676  | -0.00483 |
| HALO10010000 | 6.00423  | 3.74834  | 4.68252  |
| HALO10100000 | 4.18385  | 4.12041  | 2.93949  |
| HALO11000000 | -0.93614 | -0.49576 | 0.37361  |
| HALO11100000 | 5.56096  | 6.31642  | 6.56584  |
| N...#.....   | -1.49755 | -0.12717 | -0.75355 |
| N...#...C... | -0.12118 | -1.18588 | -1.18384 |
| N...(...     | 0.68684  | 0.44098  | 0.49664  |
| N...(...1... | -7.62837 | -6.37145 | -5.6267  |
| N...(...=... | 1.24964  | 0.87056  | 0.62218  |
| N...(...C... | 1.49565  | 0.56361  | 0.55864  |

|              |          |          |          |
|--------------|----------|----------|----------|
| N...+.....   | -0.50056 | -0.68866 | 0.37559  |
| N.....       | -1.56394 | -1.75149 | -0.99872 |
| N...C...(... | 1.06232  | 2.94189  | 1.05862  |
| N...C.....   | 1.87142  | 1.68778  | 1.87615  |
| N...[...(... | 0.62362  | -0.25462 | -1.00342 |
| O...(.....   | 1.93945  | 0.06428  | 0.62823  |
| O...(...1... | 2.62379  | 4.18683  | 3.37741  |
| O...(...F... | 2.19178  | 1.56052  | 2.87316  |
| O...(...O... | 0.93404  | 1.0614   | 1.25369  |
| O...-.....   | -0.24787 | -0.74821 | 0.12578  |
| O.....       | 0.6258   | -0.99714 | -0.31457 |
| O...=...(... | -1.87462 | -1.24971 | -0.62209 |
| O...=.....   | -0.93681 | -0.06284 | 0.56728  |
| O...=...C... | 23.74822 | 26.00449 | 22.75104 |
| O...C...(... | 0.87703  | 1.81298  | 0.81711  |
| O...C.....   | -1.12326 | 0.37109  | 0.49941  |
| O...C...C... | 1.3742   | 1.44023  | -0.12071 |
| O...[...(... | -1.75227 | -0.31425 | -1.68635 |
| O...c...1... | 0.55971  | 0.25107  | 1.12024  |
| O...c...2... | 1.12486  | 1.18488  | -0.06277 |
| S.....       | 1.18901  | 1.43581  | 1.68313  |
| S...C.....   | 1.31321  | 0.0607   | 1.80831  |
| S...C...C... | 1.75316  | 2.00407  | 1.81681  |
| S...c...2... | 0.94176  | 0.87815  | 0.44132  |
| [...(.....   | -1.37036 | -0.99749 | -1.12671 |
| [...(...1... | -2.06097 | -1.18373 | -0.43389 |
| [...(...=... | -0.93664 | -1.12196 | -1.24722 |
| [...(...[... | -2.00173 | -0.87978 | -1.3137  |
| [...+.....   | -0.43745 | -0.44023 | -0.49757 |
| [...+...N... | -0.3084  | 0.0635   | 0.18791  |
| [...-.....   | -0.80771 | -0.12243 | -1.06443 |
| [...-...O... | 0.00147  | 0.00105  | -0.99522 |
| [.....       | -0.05851 | 0.12987  | -0.37905 |
| [...N...+... | -1.18364 | -0.37661 | 0.49557  |
| [...N.....   | -0.62897 | -0.62185 | 0.06081  |
| [...O...-... | -0.74918 | -0.87884 | 0.50165  |
| [...O.....   | -0.31126 | 0.81296  | -0.4406  |
| [...[...-... | -0.25264 | 0.37766  | 0.31681  |
| [...[.....   | -0.24696 | 0.93348  | -0.62778 |
| [...[...N... | -0.37501 | 2.49617  | -0.12594 |
| c...(.....   | 1.37505  | 1.87839  | 1.81365  |

|              |          |          |          |
|--------------|----------|----------|----------|
| c...(1...    | 0.74752  | 2.74859  | 1.68441  |
| c...(2...    | 1.93891  | 0.24721  | 1.31599  |
| c...(3...    | 0.06653  | 2.05897  | -0.12611 |
| c...(C...    | 2.2534   | 2.1831   | 2.50316  |
| c...(F...    | 1.00062  | 0.00395  | 2.12819  |
| c...(Br..    | 3.56414  | 1.8738   | 1.99606  |
| c...(Cl..    | 3.12876  | 2.50423  | 2.18498  |
| c...(N...    | 0.31175  | 0.94033  | 1.06747  |
| c...(O...    | 0.74807  | 1.31132  | 1.12293  |
| c...(c...    | -0.06119 | 0.50032  | 0.31679  |
| c.....       | 0.31456  | 0.18335  | 0.25189  |
| c...1...(    | -1.12509 | -1.06051 | -0.94153 |
| c...1.....   | 1.00386  | 2.62042  | 1.87546  |
| c...1...F... | 1.18288  | -0.30861 | 0.81183  |
| c...1...Cl.. | 1.8139   | -0.93792 | 0.19002  |
| c...1...c... | 0.62316  | 2.12039  | 2.00372  |
| c...2...(    | 0.87096  | 1.31499  | 1.87439  |
| c...2.....   | 0.43386  | 0.3767   | 0.43815  |
| c...2...C... | 0.99993  | 1.00137  | 1.00132  |
| c...2...F... | 0.18289  | 0.62517  | 0.81594  |
| c...2...c... | -0.06506 | -0.50441 | -0.4369  |
| c...3...(    | 0.62792  | 0.44066  | 1.37413  |
| c...3.....   | 0.93782  | 1.18627  | 1.62783  |
| c...3...C... | -2.87076 | -2.81376 | -1.74873 |
| c...3...F... | 1.93804  | 2.12726  | 2.19179  |
| c...3...Br.. | 3.69102  | 3.1838   | 3.12058  |
| c...3...I... | 3.12864  | 4.49577  | 4.12753  |
| c...3...Cl.. | 5.80862  | 2.06588  | 7.00408  |
| c...3...c... | 1.37957  | 0.06091  | -0.49554 |
| c...4.....   | 0.87401  | -0.0048  | 0.25117  |
| c...4...F... | 0.87276  | 0.06108  | 0.37951  |
| c...4...c... | 0.68851  | 0.05847  | 0.87082  |
| c...C.....   | 0.6209   | 1.87481  | 1.06403  |
| c...C...O... | 3.68293  | 0.37838  | 2.3161   |
| c...Cl.....  | 1.74712  | 1.12514  | 1.74791  |
| c...O...(    | 1.50495  | 1.81345  | 1.12323  |
| c...O.....   | 0.99564  | 0.43771  | 1.43386  |
| c...O...C... | -0.06641 | 1.12473  | 0.12544  |
| c...S.....   | 1.68622  | 0.24836  | 0.8119   |
| c...S...C... | 0.18515  | 0.99742  | 1.81346  |
| c...c...(    | -0.06383 | 0.25486  | 0.50153  |

|              |          |          |          |
|--------------|----------|----------|----------|
| c...c.....   | 0.06174  | 0.25191  | 0.4986   |
| c...c...1... | 1.62106  | 2.18844  | 2.24594  |
| c...c...2... | -0.24945 | 0.44108  | 0.50383  |
| c...c...3... | -0.68314 | -0.12908 | -0.5594  |
| c...c...4... | 8.24523  | 7.24897  | 7.05873  |
| c...c...c... | -0.43676 | 0.12175  | -0.24988 |
| c...n...(... | -0.05962 | -2.05815 | -1.56127 |
| c...n...1... | -0.62737 | 0.25365  | -0.30885 |
| c...n...2... | 0.7547   | 0.44035  | 0.87604  |
| c...n...3... | -0.75131 | -2.68602 | -3.62766 |
| c...n...c... | 7.00095  | 6.12542  | 5.87162  |
| c...o...(... | 0.62088  | 1.75474  | 2.50485  |
| c...o...1... | 0.18396  | 1.93332  | 1.87147  |
| c...s...(... | 3.37056  | 1.56533  | -0.0604  |
| c...s...1... | 1.44076  | 2.87951  | 2.87692  |
| c...s...2... | -1.12978 | -3.25321 | -1.19202 |
| n...(.....   | 2.18923  | 2.37328  | 1.81699  |
| n...(...C... | 1.00333  | 0.99768  | 0.99787  |
| n...(...Cl.. | 0.12662  | -2.18938 | -1.74528 |
| n.....       | 0.6842   | 2.12017  | 1.9354   |
| n...1...(... | 0.74847  | 3.99903  | 2.62657  |
| n...1.....   | 1.06013  | 0.5641   | 0.43988  |
| n...1...c... | 0.87092  | 0.1871   | 0.37835  |
| n...2.....   | -0.06161 | 0.12144  | -0.30842 |
| n...2...c... | 1.18477  | 1.62251  | 0.62665  |
| n...3...(... | 1.00287  | 0.99825  | 0.99821  |
| n...3.....   | -6.12724 | -3.8733  | -1.25252 |
| n...3...c... | 2.059    | 1.56189  | 1.12425  |
| n...C.....   | 1.81022  | -0.0674  | 2.12254  |
| n...C...C... | 1.43707  | 2.12882  | 1.43285  |
| n...c...(... | 5.99553  | 3.12957  | 3.74944  |
| n...c.....   | 1.6839   | 3.12792  | 1.99901  |
| n...c...1... | 1.7516   | 1.68741  | 2.18715  |
| n...c...2... | 0.68364  | 2.37425  | 1.37557  |
| n...c...3... | 1.25109  | 0.05978  | -0.56365 |
| n...c...c... | 0.56432  | -0.19049 | 0.19069  |
| n...c...n... | 0.87189  | 1.80967  | 3.43599  |
| n...o...3... | 7.50441  | 5.06278  | 5.24536  |
| o...(.....   | -0.8792  | -0.31369 | 0.81327  |
| o...(...C... | 1.69042  | 1.62564  | 1.49728  |
| o...(...Br.. | 6.50392  | 7.87973  | 6.19226  |

|              |          |          |          |
|--------------|----------|----------|----------|
| o...(N...    | -8.94138 | -8.87196 | -8.06028 |
| o...(O...    | 1.56343  | -0.50328 | 0.62002  |
| o...(c...    | -0.62336 | 0.31075  | 0.99961  |
| o.....       | -1.87234 | -0.81178 | -1.75146 |
| o...1...(    | 0.56727  | 1.00038  | 1.18365  |
| o...1.....   | 1.12023  | 1.18673  | 0.87685  |
| o...2.....   | 1.00002  | 1.00344  | 1.00018  |
| o...2...c... | 0.99743  | 0.99779  | 0.99645  |
| o...3...(    | 6.245    | 5.62651  | 4.80844  |
| o...3.....   | 6.06221  | 4.44164  | 4.2465   |
| o...c...(    | 0.06731  | 0.93395  | 1.8168   |
| o...c.....   | 1.62801  | 1.05869  | 0.1281   |
| o...c...3... | 1.99888  | 1.99515  | -0.31522 |
| o...n.....   | 6.80983  | 6.68269  | 4.94045  |
| o...n...c... | 6.99661  | 5.1243   | 6.50195  |
| s...(.....   | 0.44117  | -0.74504 | 0.8134   |
| s...(C...    | -2.75376 | -1.62116 | -0.81524 |
| s...(F...    | 0.5653   | 1.06678  | 1.1295   |
| s...(Cl..    | 0.62438  | 0.49995  | -1.99896 |
| s.....       | -1.49627 | 0.18594  | -0.62552 |
| s...1...(    | 1.75353  | 1.56708  | 1.12225  |
| s...1.....   | 0.4326   | 0.49531  | 0.87115  |
| s...2...(    | -0.87139 | -0.24557 | 0.00037  |
| s...2.....   | -0.06615 | -2.68491 | -1.87123 |
| s...2...c... | 1.62832  | 0.12348  | 1.56115  |
| s...3.....   | 1.0028   | 1.00277  | 1.00177  |
| s...3...c... | 1.00378  | 1.00337  | 0.99564  |
| s...c...(    | 1.31687  | 2.50309  | 1.93447  |
| s...c.....   | 1.1288   | 3.81191  | 1.69118  |
| s...c...2... | 0.75005  | 1.43368  | 3.62084  |
| s...c...n... | -1.37636 | -2.62828 | -0.62582 |

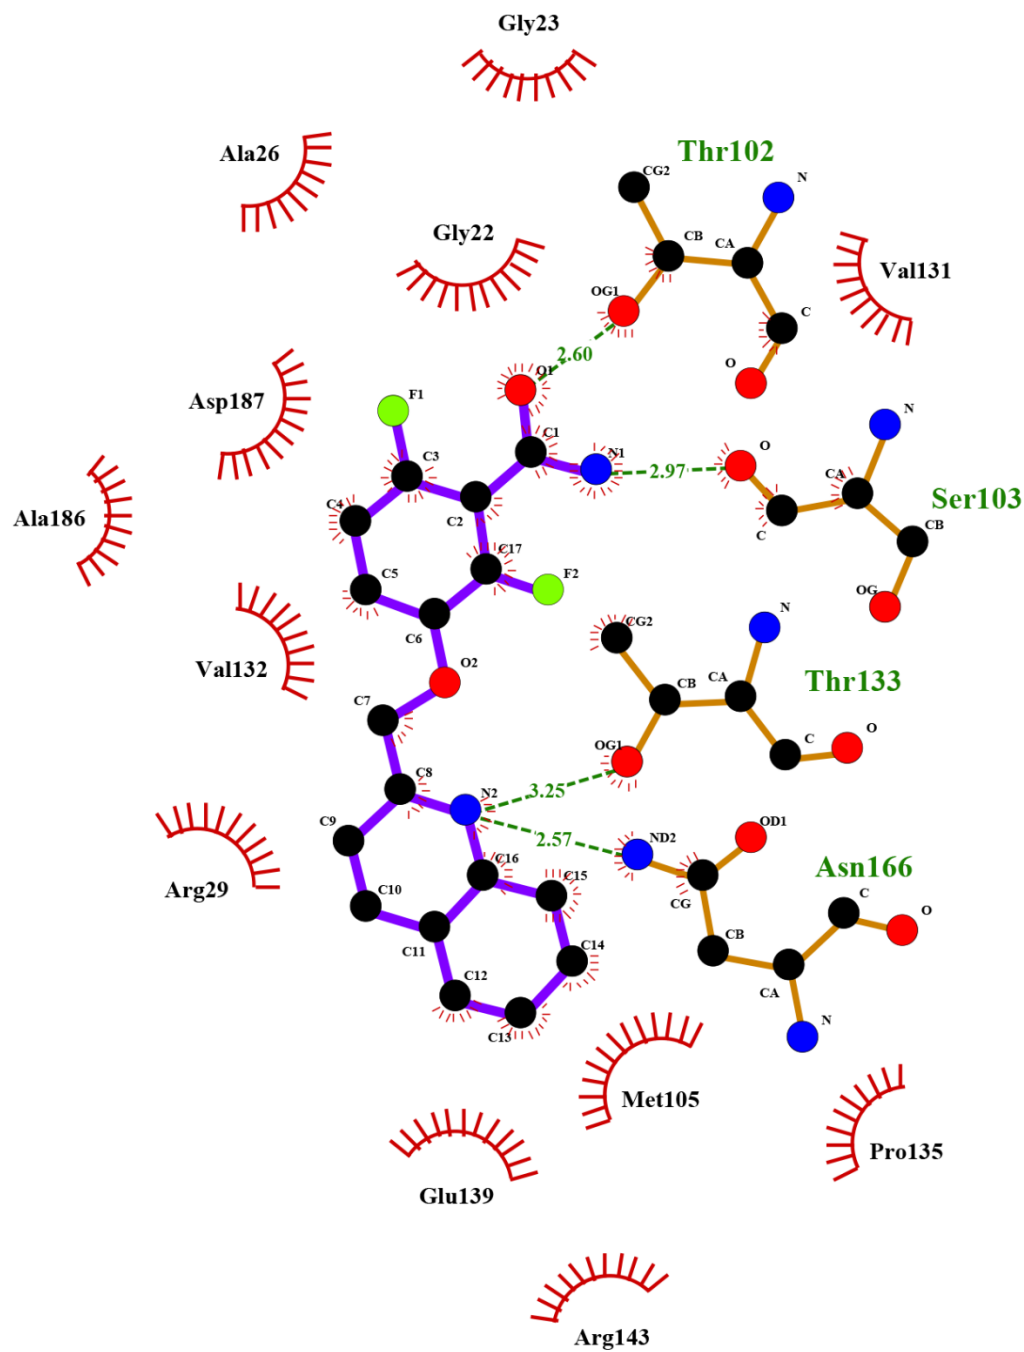

Figure S1. Two-dimensional representation of interaction between molecule A0 and amino acids inside FtsZ binding pocket.

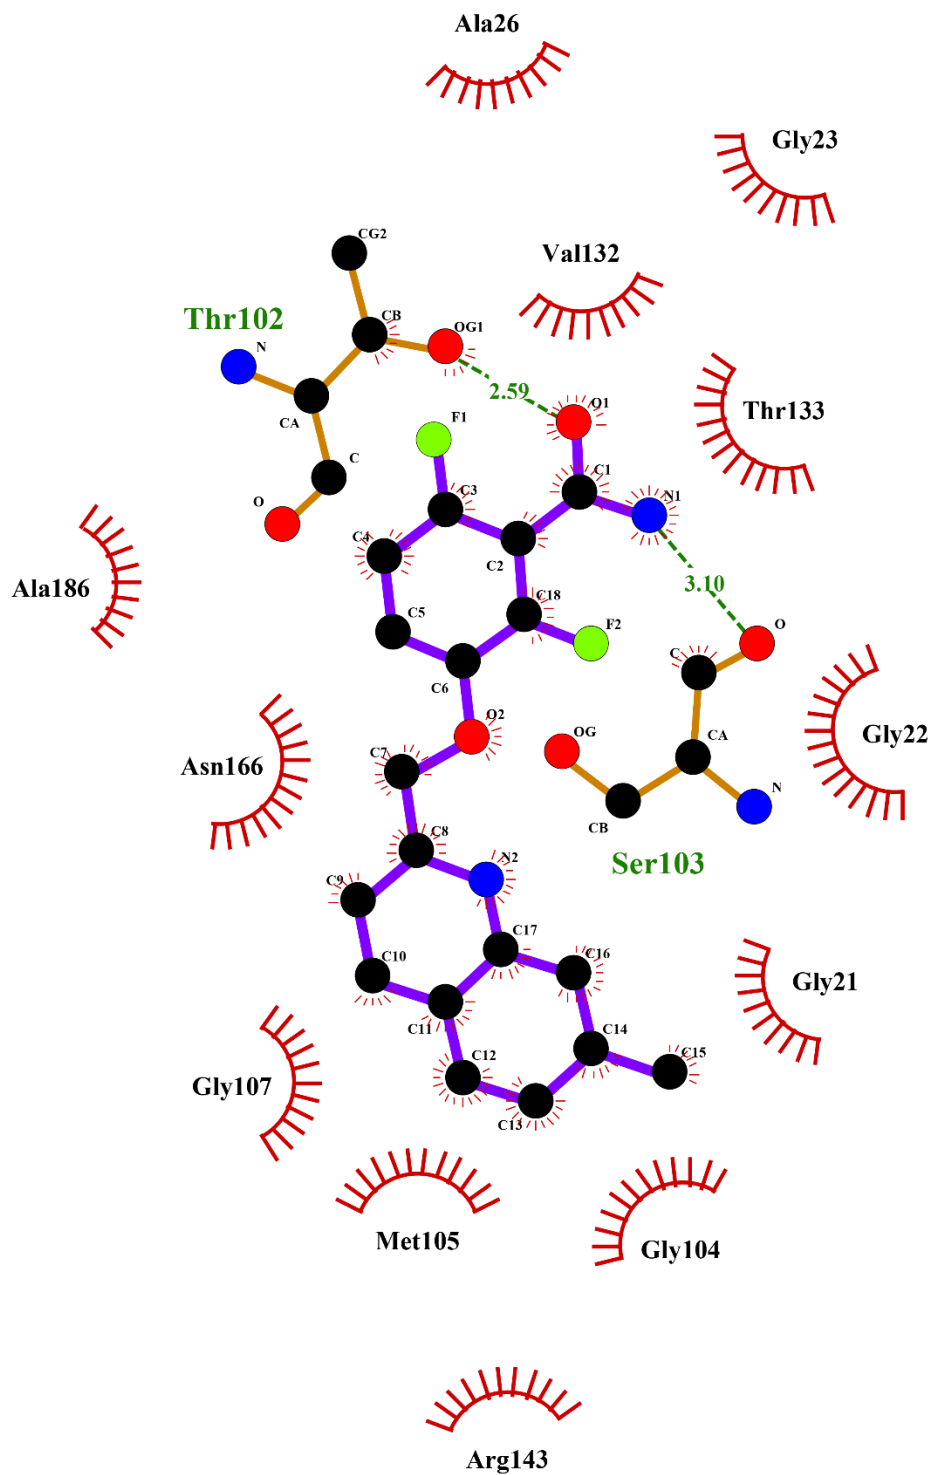

Figure S2. Two-dimensional representation of interaction between molecule A1 and amino acids inside FtsZ binding pocket.



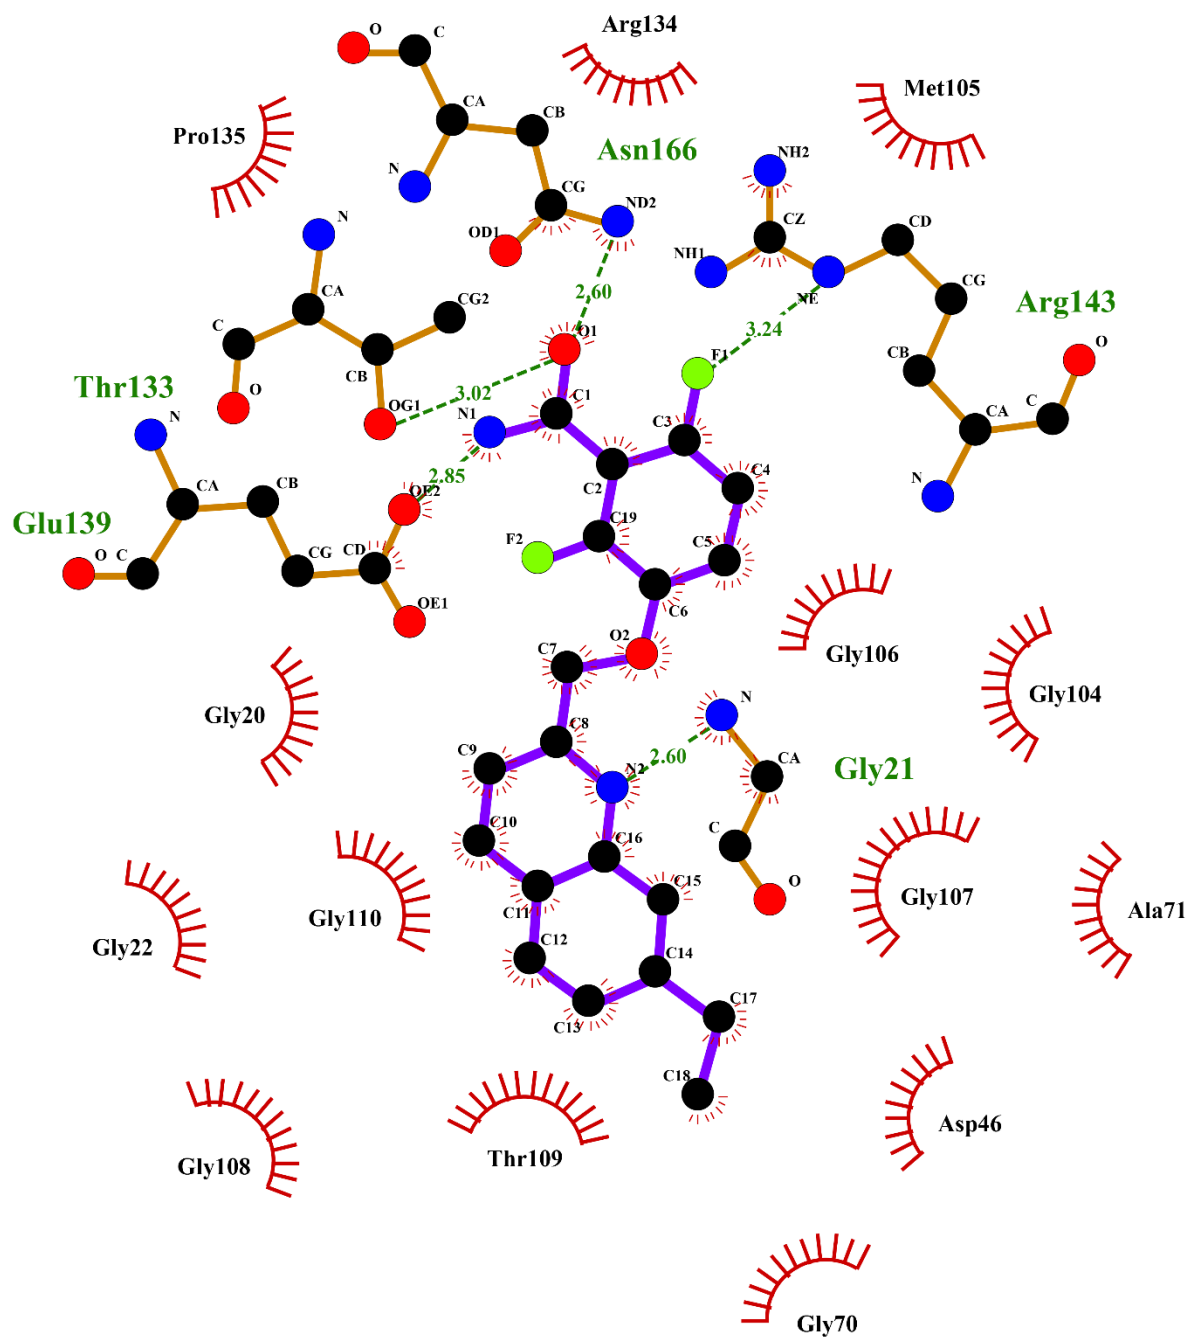

Figure S3. Two-dimensional representation of interaction between molecule A2 and amino acids inside FtsZ binding pocket.

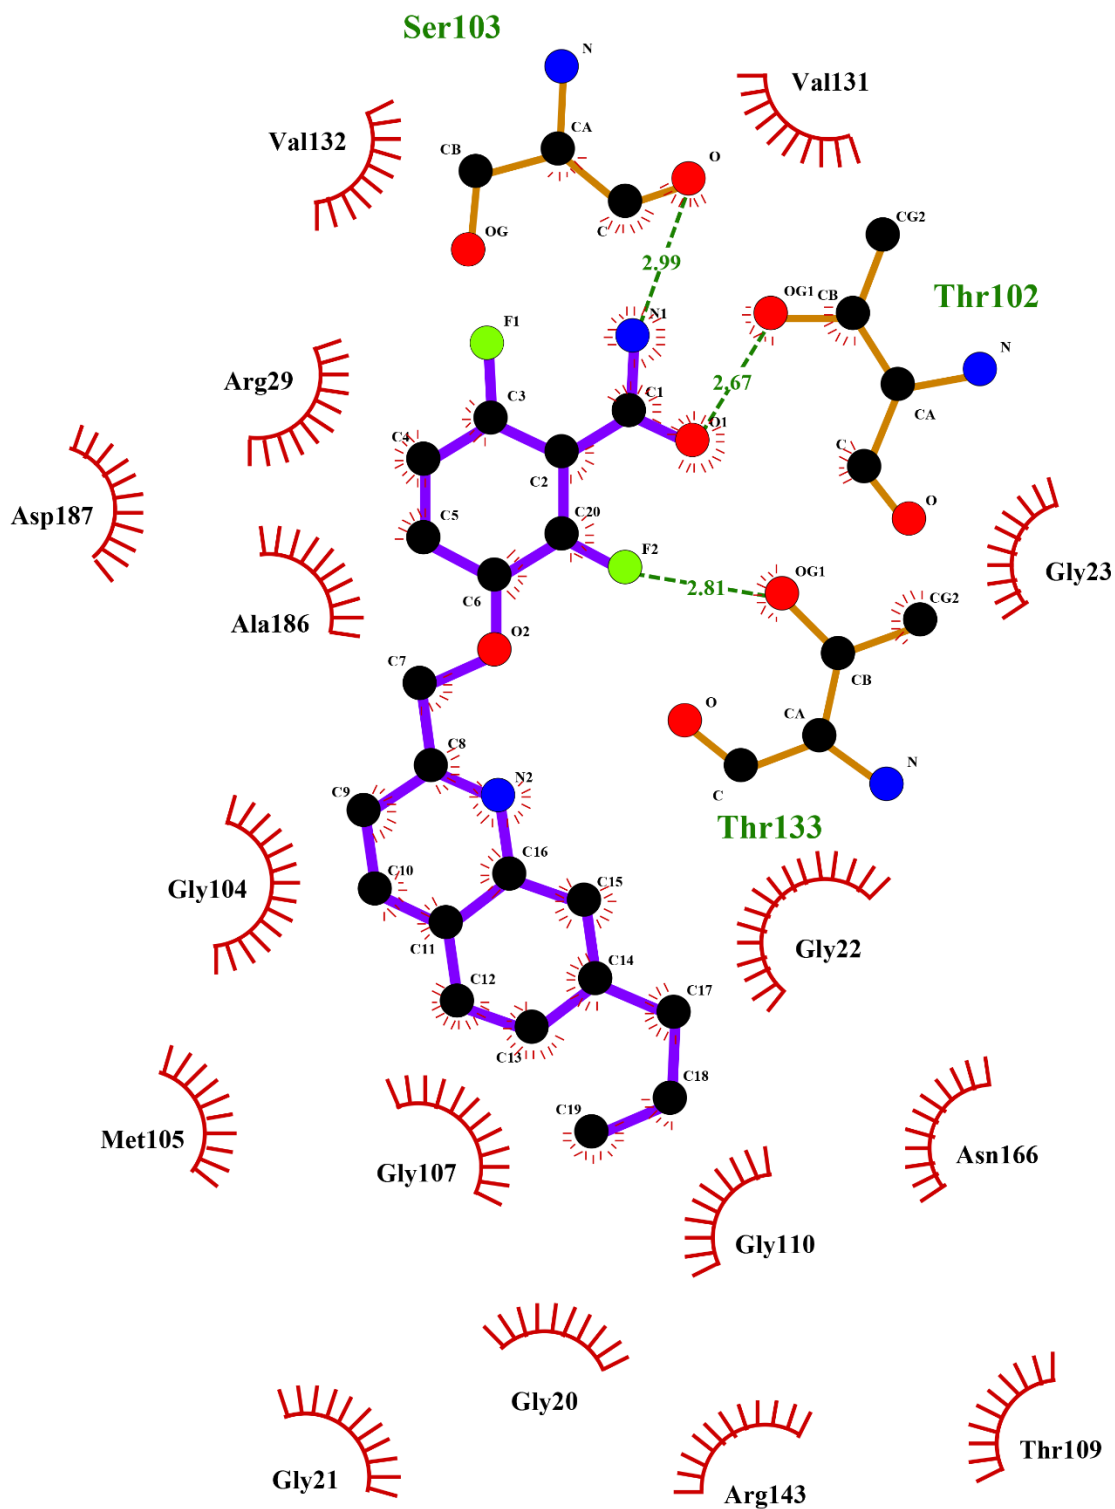

Figure S4. Two-dimensional representation of interaction between molecule A3 and amino acids inside FtsZ binding pocket.

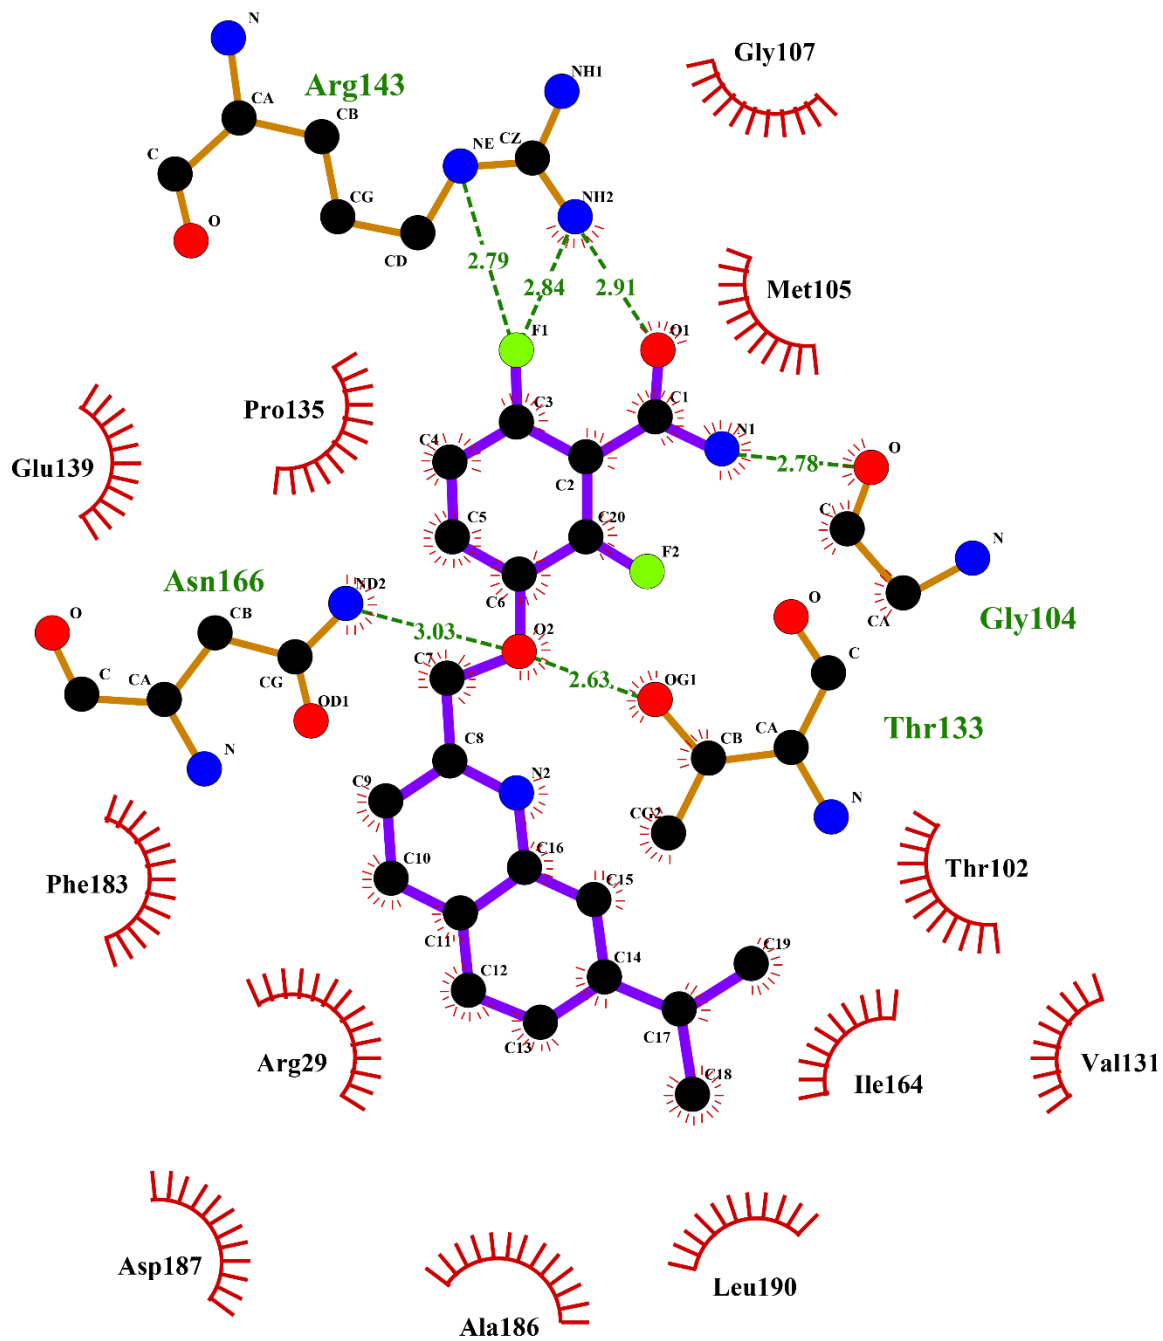

Figure S5. Two-dimensional representation of interaction between molecule A4 and amino acids inside FtsZ binding pocket.

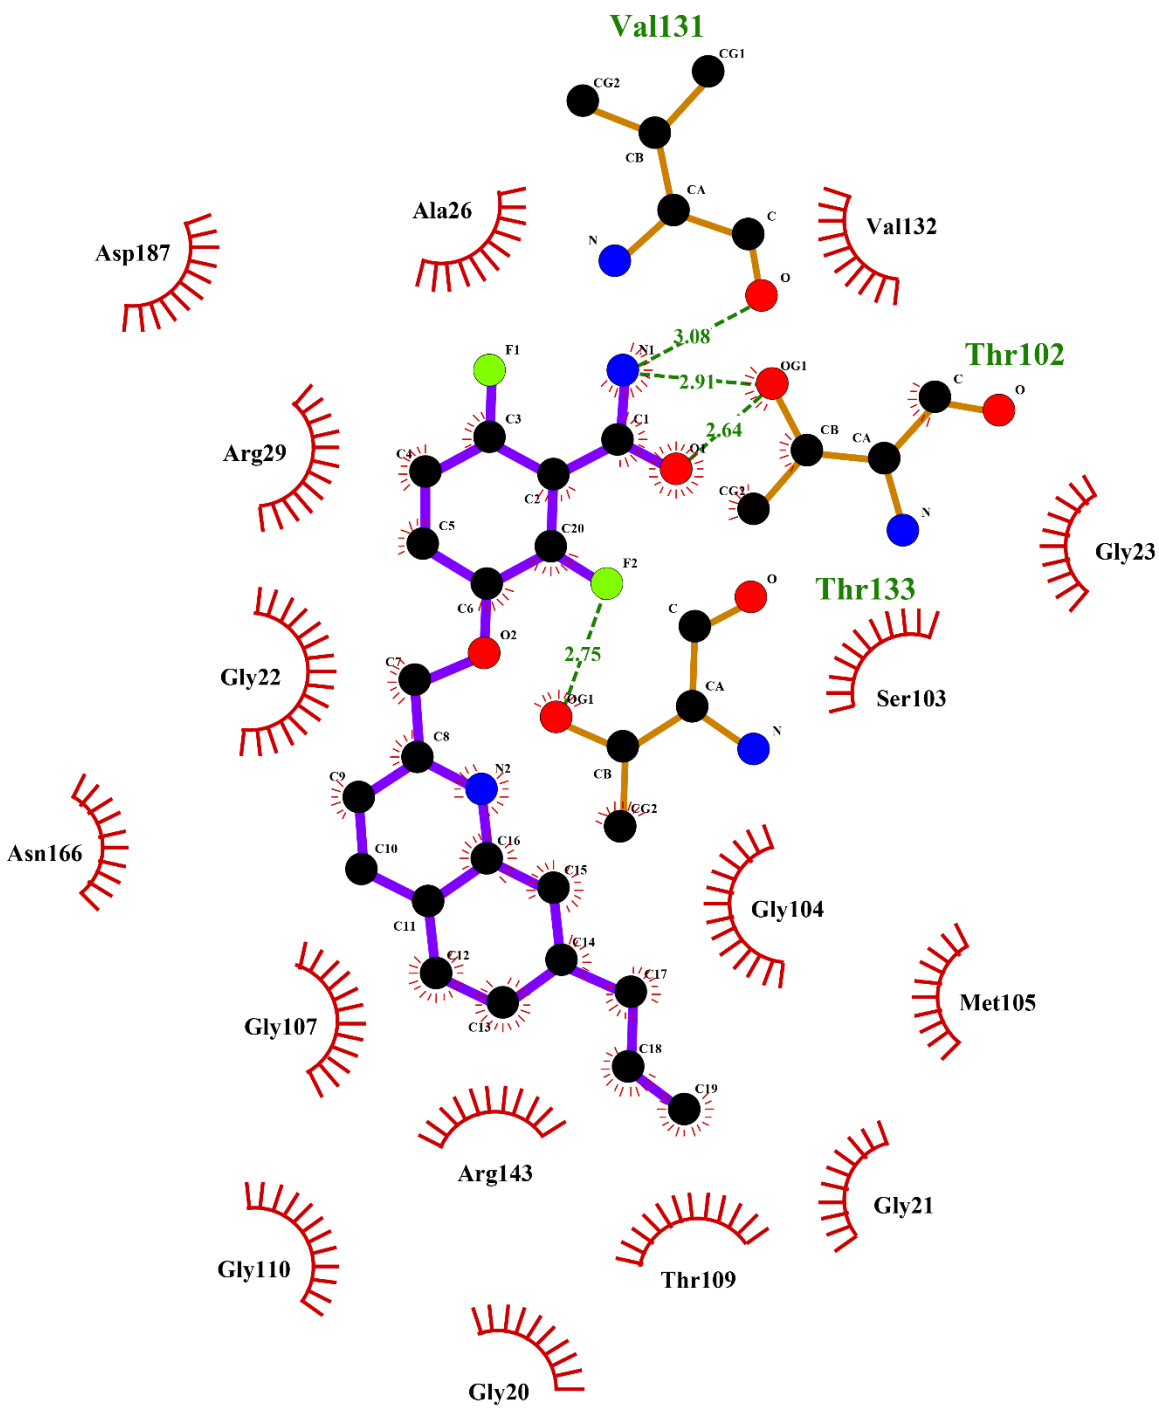

Figure S6. Two-dimensional representation of interaction between molecule A5 and amino acids inside FtsZ binding pocket.

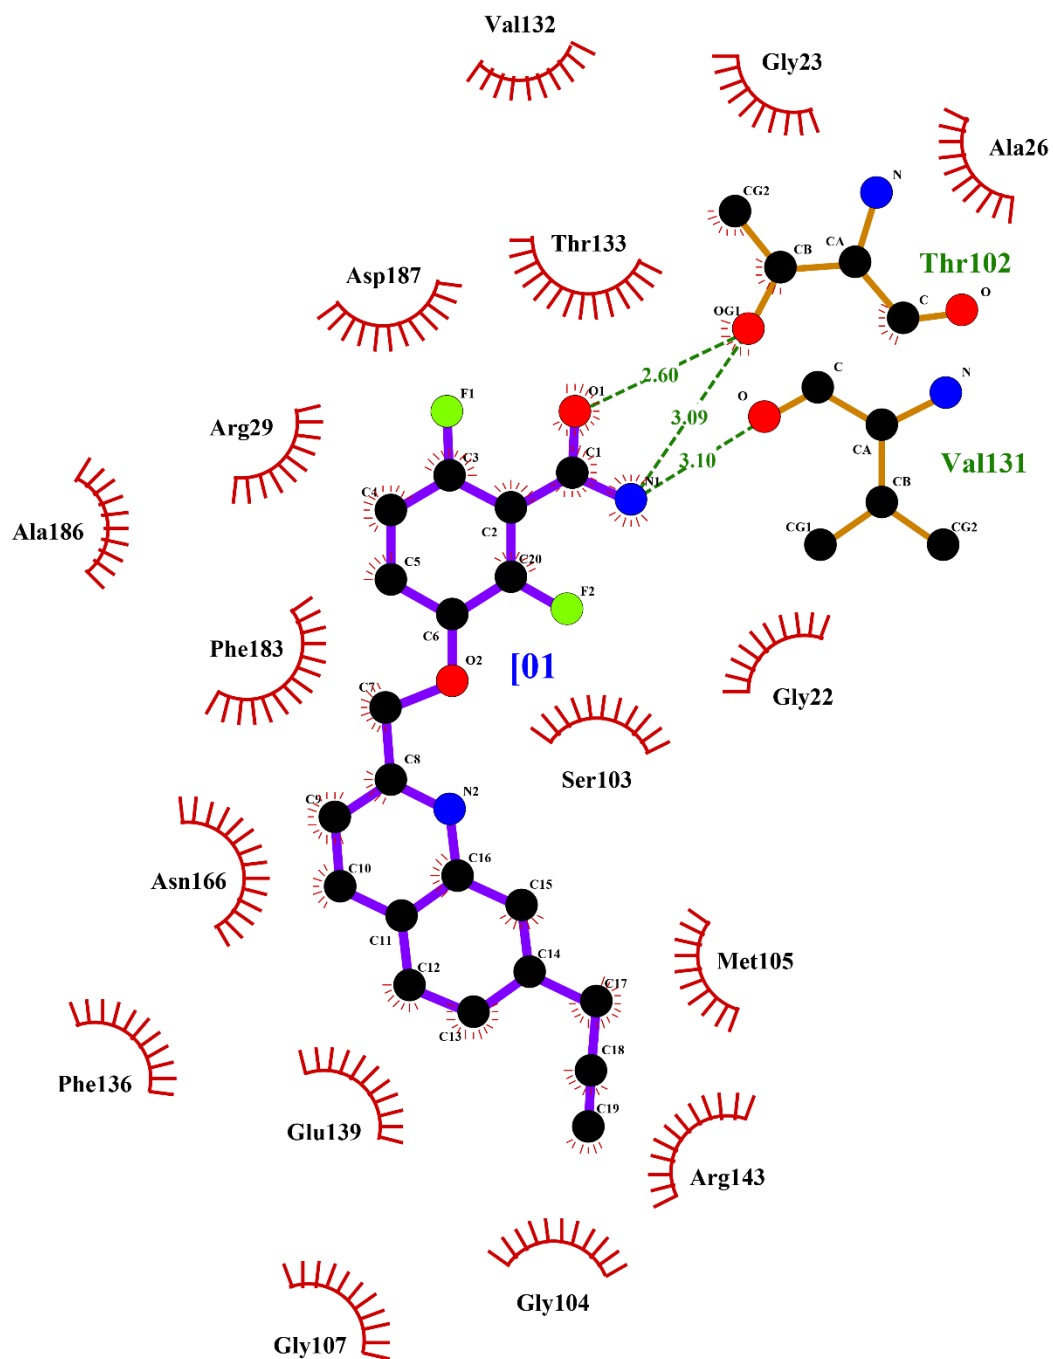

Figure S7. Two-dimensional representation of interaction between molecule A6 and amino acids inside FtsZ binding pocket.

## References

1. Gadaleta D, Mangiatordi GF, Catto M, Carotti A, Nicolotti O (2016) Applicability Domain for QSAR Models: Where Theory Meets Reality. *IJQSPR* 1: 45-63.
2. Gramatica P (2007) Principles of QSAR models validation: internal and external. *QSAR Comb Sci* 26: 694-701.
3. Roy PP, Leonard JT, Roy K (2008) Exploring the impact of size of training sets for the development of predictive QSAR models. *Chemom Intell Lab Syst* 90: 31-42.
